# Supplementary material
Source: PubMed Central journal article supplement (PMC9722626)
Supplement: NIHMS1839208-supplement-2.pdf [file NIHMS1839208-supplement-2.pdf]

**Supplemental Information**  
**Stress-Mediated Attenuation of Translation Undermines T Cell Tumor Control**

Brian P. Riesenber<sup>1,2</sup>, Elizabeth G. Hunt<sup>1,3</sup>, Megan D. Tennant<sup>2,4</sup>, Katie E. Hurst<sup>1</sup>, Alex M. Andrews<sup>2,4</sup>, Lee R. Leddy<sup>4</sup>, David M. Neskey<sup>4</sup>, Elizabeth G. Hill<sup>6</sup>, Guillermo O. Rangel Rivera<sup>2,5</sup>, Chrystal M. Paulos<sup>2,5</sup>, Peng Gao<sup>7</sup>, Jessica E. Thaxton<sup>1,3#</sup>.

<sup>1</sup> Immunotherapy Program, Lineberger Comprehensive Cancer Center, University of North Carolina at Chapel Hill; Chapel Hill, NC 27514; USA

<sup>2</sup> Department of Microbiology & Immunology, Medical University of South Carolina, Charleston, SC 29425; USA

<sup>3</sup> Department of Department of Cell Biology & Physiology, University of North Carolina at Chapel Hill;

Chapel Hill, NC 27514; USA

<sup>4</sup> Hollings Cancer Center, Medical University of South Carolina, Charleston, SC 29425; USA

<sup>5</sup> Department of Surgery and Microbiology & Immunology, Winship Cancer Institute, Emory University, Atlanta, GA, 30322; USA

<sup>6</sup> Public Health Sciences, Hollings Cancer Center Biostatistics Shared Resource; Director, Medical University of South Carolina, Charleston, SC 29425; USA

<sup>7</sup> Department of Medicine, Metabolomics Core Facility; Director, Feinberg School of Medicine, Northwestern University, Chicago, IL 60611; USA

#Corresponding author

Correspondence: Dr. Jessica Thaxton  
Department of Cell Biology & Physiology  
Immunotherapy Program, Lineberger Comprehensive Cancer Center  
University of North Carolina at Chapel Hill  
125 Mason Farm Road  
Chapel Hill, NC 27514

Email: [jess.thaxton@med.unc.edu](mailto:jess.thaxton@med.unc.edu)

Key Words: T cell, immunotherapy, tumor immunology, metabolism, protein synthesis, catabolism, proteasome, glucose

Running Title: Proteasome fueled metabolism supports tumor immunity

Financial Support: 1R01CA248359-01 (JET), T32 5T32AI132164-04 (BPR), T32 DE01755 (MDT), T32 CA 193201 (AMA)

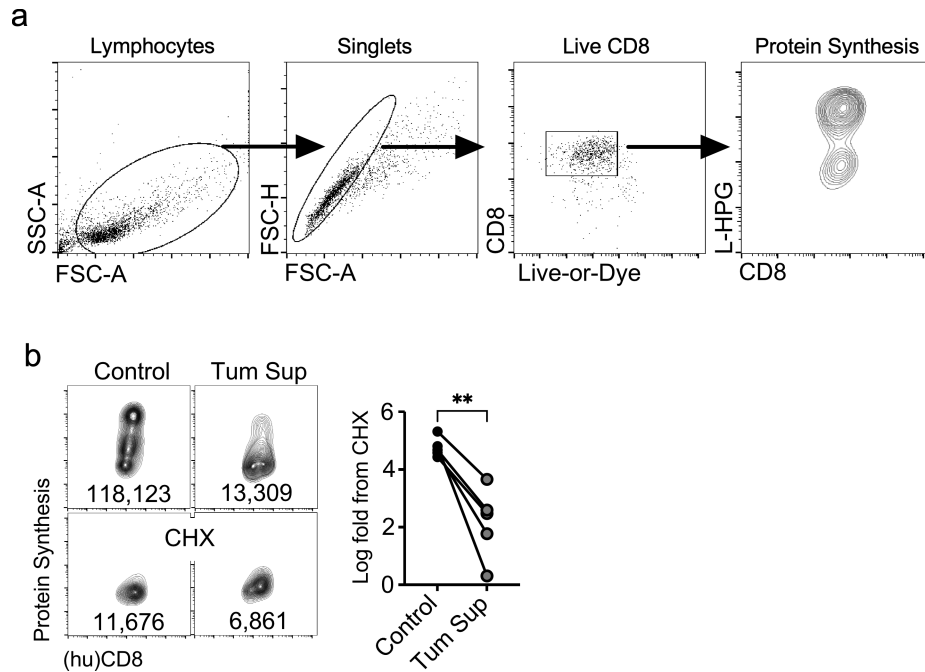

**Supplemental Figure 1. Tumor conditioned media reduces T cell protein synthesis.** **a)** Gating strategy for quantification of protein synthesis in live CD8 T cells harvested from the T cell-tumor cell transwell assay. **b)** Representative FACS plots and quantification of protein synthesis in human CD8 PBMC ( $n=5$  donors) activated with CD3/CD28 in the presence or absence of supernatant from freshly isolated B16F1 melanoma tumors. Data presented as paired samples with  $n = 5$  individual donors. \*\*  $p < 0.01$ , two tailed paired Student's  $t$  test.

**a**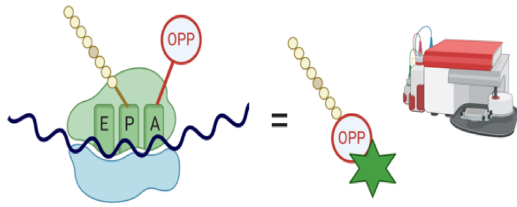**b**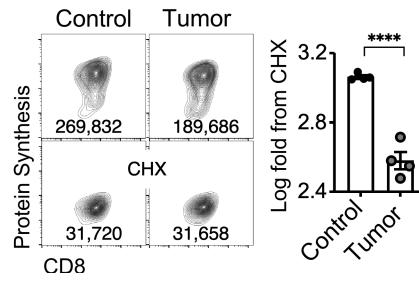

**Supplemental Figure 2. Confirmation of tumor mediated translation attenuation in T cells.**

**a)** Schematic representation of the O-Propargyl-puromycin assay used to measure protein synthesis. **b)** Representative FACS plots and quantification of protein synthesis from OT-1 T cells harvested from the T cell-tumor cell transwell assay. Data presented as mean  $\pm$  SEM, representative of two independent experiments. \*\*\*\*  $p < 0.0001$ , two tailed Student's *t* test.

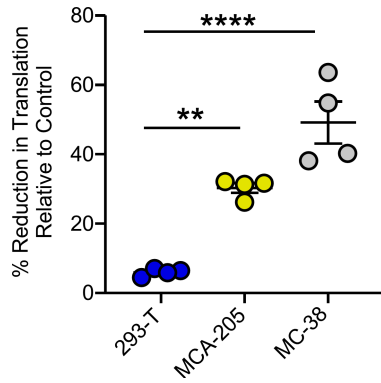

**Supplemental Figure 3. Reduced protein synthesis is a cancer cell specific phenomenon**  
 Percentage of reduction in translation rates relative to non-tumor controls of OT-1 T cells incubated for 36 hours in the presence of MCA-205 Fibrosarcoma, MC-38 Adenocarcinoma, or 293-T Human Embryonic Kidney cells in the transwell coculture assay. Data are presented as mean  $\pm$  SEM, representative of two independent experiments. \*  $p < 0.05$ , \*\* $p < 0.01$ , \*\*\* $p < 0.001$ , \*\*\*\* $p < 0.0001$  by One Way ANOVA with Tukey's multiple comparison test.

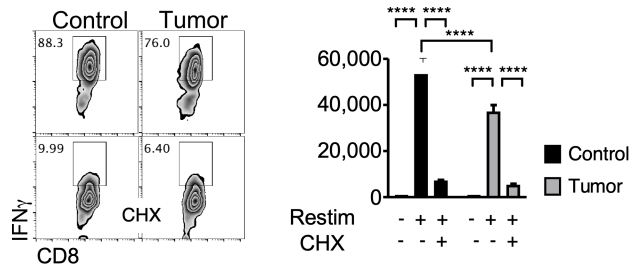

**Supplemental Figure 4. Tumor stress reduces T cell functionality.** Representative FACS plots and quantification of IFN $\gamma$  production from OT-1 T cells harvested from the T cell-tumor cell transwell assay followed by a 4-hour stimulation with Cell Stimulation Cocktail and GolgiPlug Brefeldin A  $\pm$  pretreatment with protein synthesis inhibitor cycloheximide (CHX). Data presented as mean  $\pm$  SEM, representative of two independent experiments. \*\*\*\* p < 0.0001 by One-Way ANOVA.

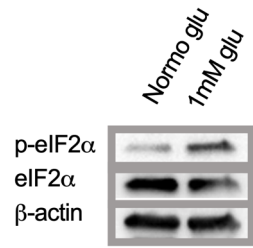

**Supplemental Figure 5. Glucose deprivation induces p-eIF2 $\alpha$  in T cells.** Western blot analysis from OT-1 T cells cultured in normal or low glucose (1mM). Data are representative of two independent experiments.

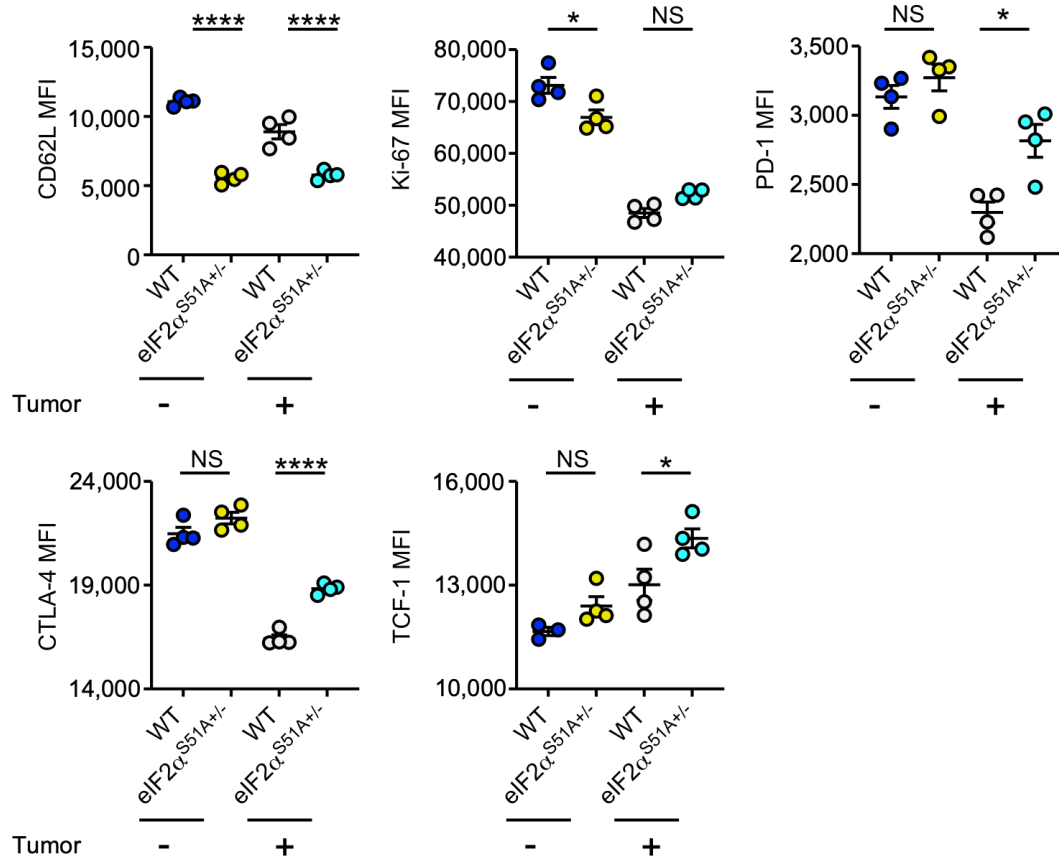

**Supplemental Figure 6. Phenotypic analysis of p-eIF2a T cells.** High dimensional flow cytometry analysis of WT or eIF2α<sup>S51A+/-</sup> OT-1 T cells harvested from control or tumor-seeded transwell assay. Mean Fluorescent intensities of CD62L, Ki-67, PD-1, CTLA-4, and TCF-1. Data presented as mean ± SEM, representative of two independent experiments. p < 0.05, \*\*p < 0.01, \*\*\*p < 0.001, \*\*\*\*p < 0.0001 by two tailed Student's *t* Test.

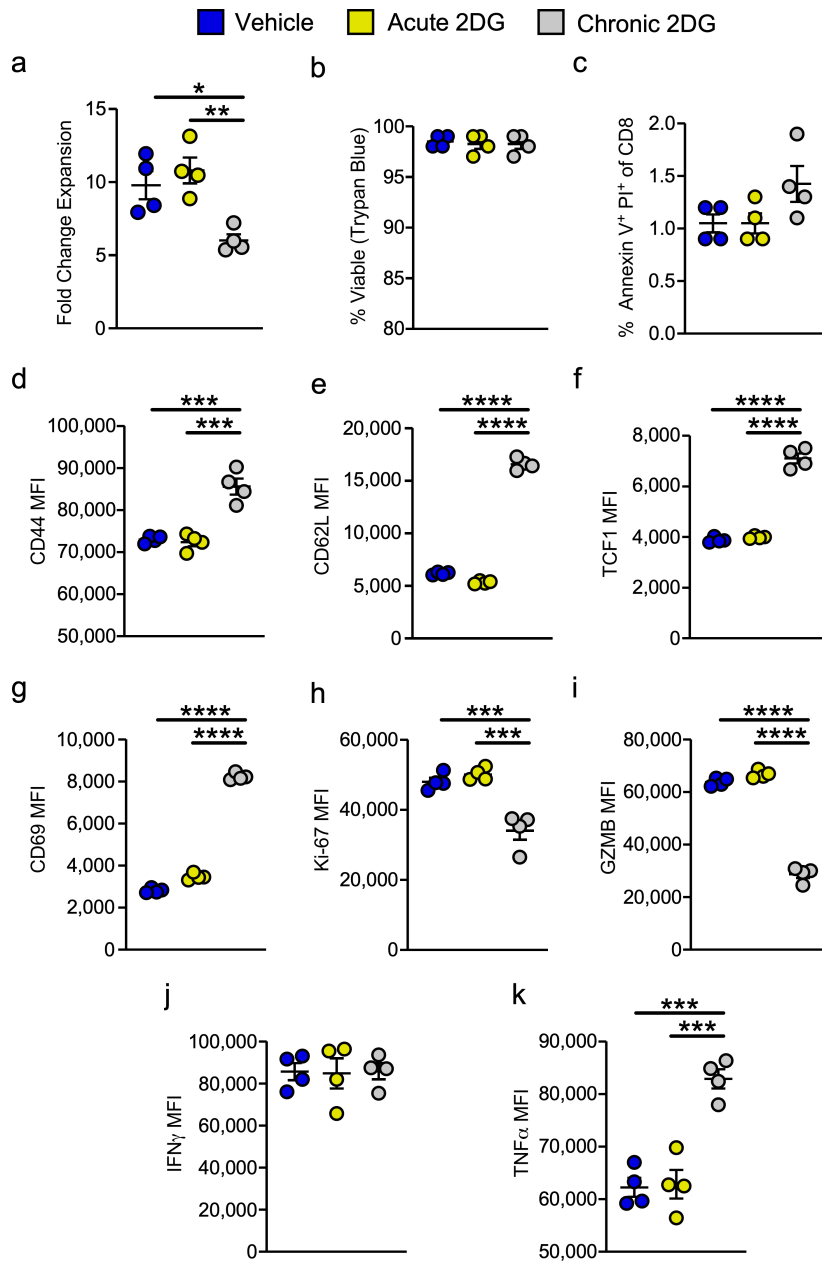

**Supplemental Figure 7. Chronic 2DG drives a memory-like T cell phenotype.** 3-day *ex vivo* expanded OT-1 T cells were treated with 2DG or vehicle for 2 (Acute) or 36 hours (chronic) and **a)** fold change expansion, **b)** trypan blue exclusion viability, and **c)** Annexin V and propidium iodide staining were assessed. **d-k)** Mean fluorescent intensities (MFI) from spectral flow analysis are depicted. For **(j-k)** cells were stimulated for 4 hours with Cell Stimulation Cocktail and GolgiPlug Brefeldin A. Data presented as mean  $\pm$  SEM, representative of two independent experiments.  $p < 0.05$ ,  $**p < 0.01$ ,  $***p < 0.001$ ,  $****p < 0.0001$  by One Way-ANOVA with Tukey's multiple comparison test.



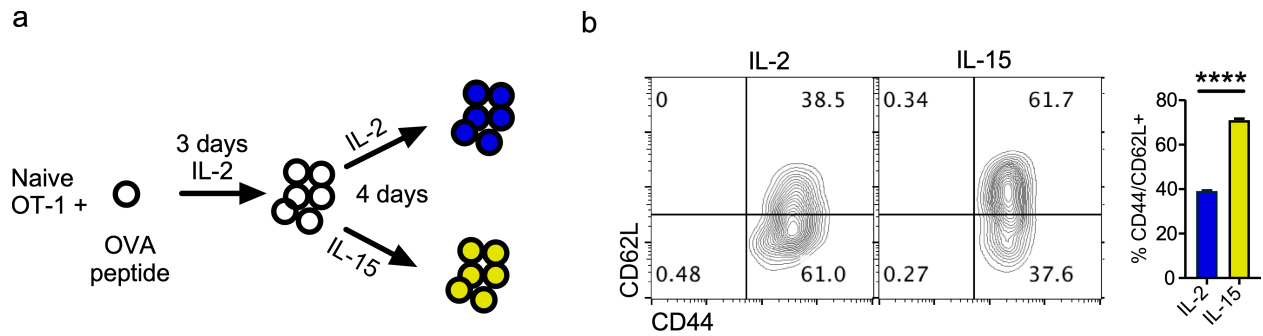

**Supplemental Figure 8. Conditioning with IL-15 generates a memory-like T Cell phenotype.**

**a)** Graphical representation of the memory or effector like cytokine conditioning scheme. **b)** Representative FACS plots and quantification of CD44 and CD62L expression on IL-2 or IL-15 conditioned OT-1 T cells as demonstrated in **(a)**. Data presented as mean  $\pm$  SEM, representative of two independent experiments. \*  $p < 0.05$ , \*\* $p < 0.01$ , \*\*\* $p < 0.001$ , \*\*\*\* $p < 0.0001$  by two tailed student's *t* test.

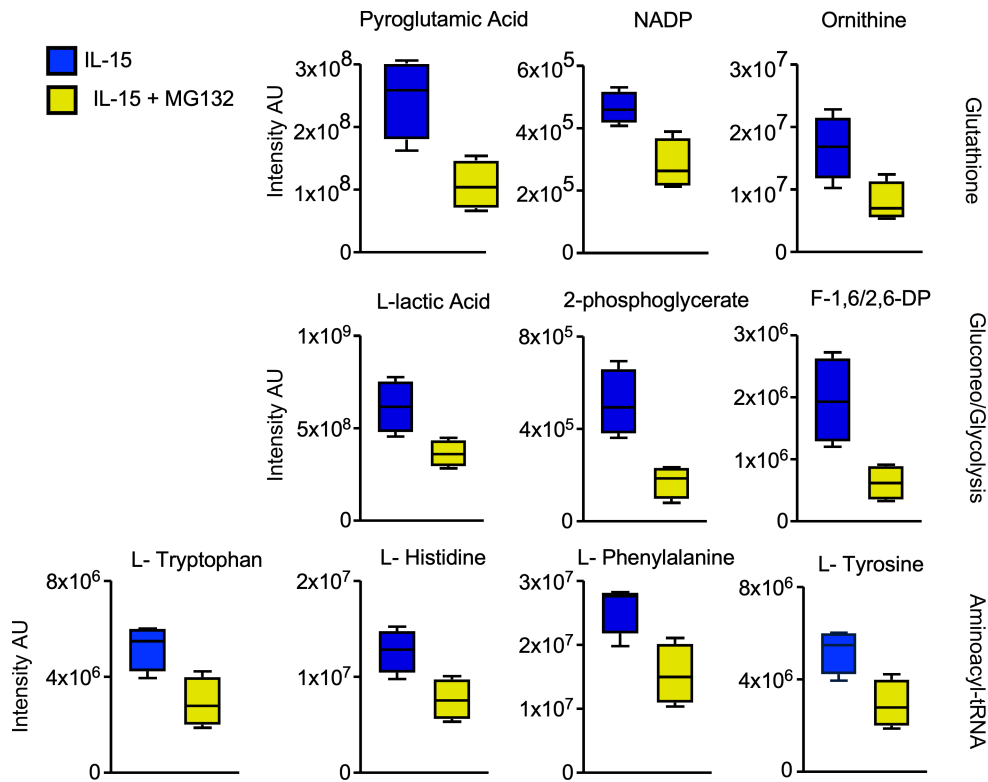

**Supplemental Figure 9. Metabolites responsible for driving pathway enrichment.** Individual intensities of select metabolites identified as differentially expressed between groups organized by associated enriched pathways (across rows). Data generated from global metabolomics analysis of OT-1 conditioned T cells harvested from the tumor-transwell coculture system conditioned with IL-15 ± MG132 for 4 hours prior to harvest. Data presented as mean ± the min max (whisker) with 1<sup>st</sup> and 3<sup>rd</sup> quartile, representative of two independent experiments.

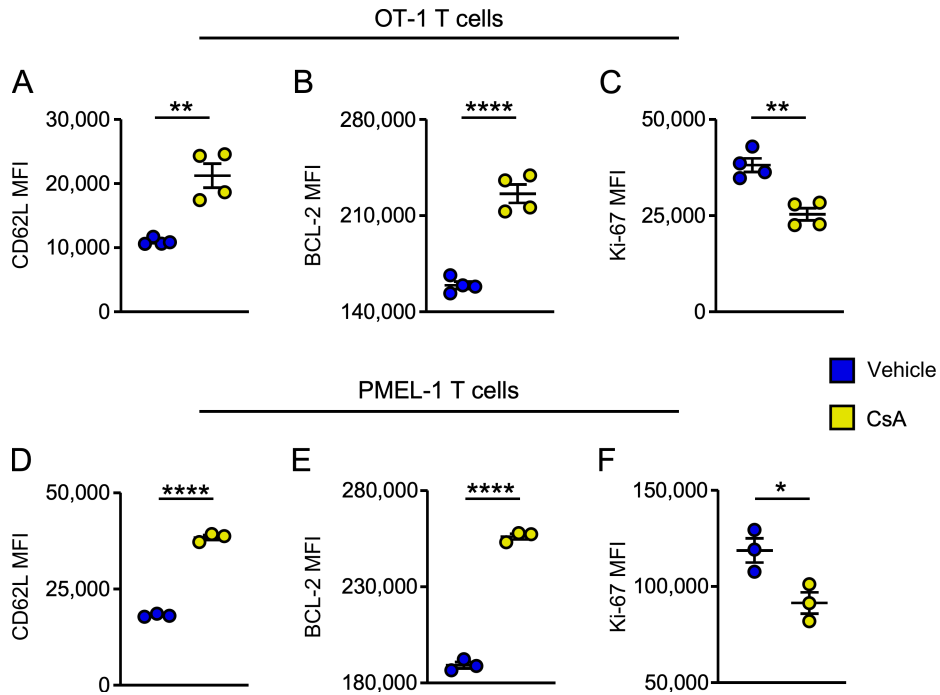

**Supplemental Figure 10. Phenotypic analysis of CsA conditioned OT1 and pmel T cells.** OT-1 or PMEL T cells were activated for 3 days with their respective cognate antigens and differentiated in the presence of IL-2 and Vehicle or CsA (2.5 $\mu$ M) for 4 days followed by High dimensional spectral flow cytometry analysis. Mean fluorescent intensities of CD62L, BCL-2, and Ki-67 in OT-1 (A-C) or PMEL (D-F) T cells. Data presented as mean  $\pm$  SEM, representative of two independent experiments.  $p < 0.05$ , \*\* $p < 0.01$ , \*\*\* $p < 0.001$ , \*\*\*\* $p < 0.0001$  by two tailed Student's  $t$  Test.

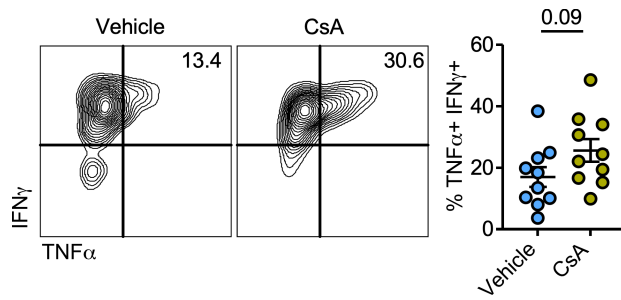

**Supplemental Figure 11. Polyfunctional cytokine synthesis of CsA-infused OT1 T cells.** 7-day expanded OT1 T cells (CD45.2<sup>+</sup>) treated with vehicle or CsA were infused to CD45.1<sup>+</sup> C57BL/6 mice bearing 7-day established B16-F1-OVA melanomas and cytokine synthesis from transferred CD8 TILs was assessed 5 days post transfer. Data are representative of two independent experiments. p values are noted in each panel based on statistical analysis by two tailed Student's t-test. Data points represent individual mice, all error bars indicate the SEM.
